# Supplementary material for: Naphthoquinone–dopamine hybrids disrupt α-synuclein fibrils by their intramolecular synergistic interactions with fibrils and display a better effect on fibril disruption
Source: Royal Society of Chemistry journal article supplement (doi:10.1039/d3cp00340j), 2023-01-01
Supplement: d3cp00340j1.pdf [file d3cp00340j1.pdf]

## Supplementary Information

Naphthoquinone-dopamine hybrids disrupt  $\alpha$ -synuclein fibrils  
by their intermolecular synergistic interactions with fibrils and  
displays a better effect on fibril disruption

Yun Zhou<sup>†</sup>, Yifei Yao<sup>†</sup>, Zhongyuan Yang, Yiming Tang and Guanghong Wei\*

Department of Physics, State Key Laboratory of Surface Physics, Key Laboratory for  
Computational Physical Sciences (Ministry of Education), Fudan University,  
Shanghai 200438, People's Republic of China.

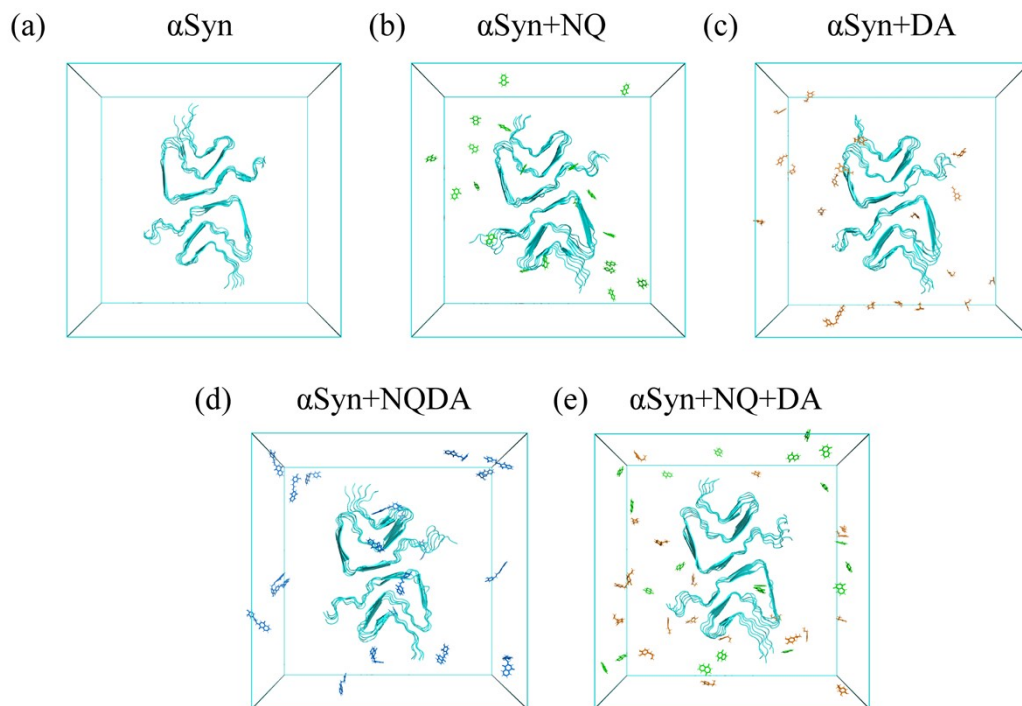

**Fig. S1** The initial structure of  $\alpha$ Syn system,  $\alpha$ Syn+NQDA system,  $\alpha$ Syn+NQ system,  $\alpha$ Syn+DA system.  $\alpha$ Syn fibril is shown in cyan. NQDA molecule is shown in blue. NQ molecule is shown in green. DA molecule is shown in orange. (a)  $\alpha$ Syn system. (b)  $\alpha$ Syn+NQ system. (c)  $\alpha$ Syn+DA system. (d)  $\alpha$ Syn+NQDA system. (e)  $\alpha$ Syn+NQ+DA system.

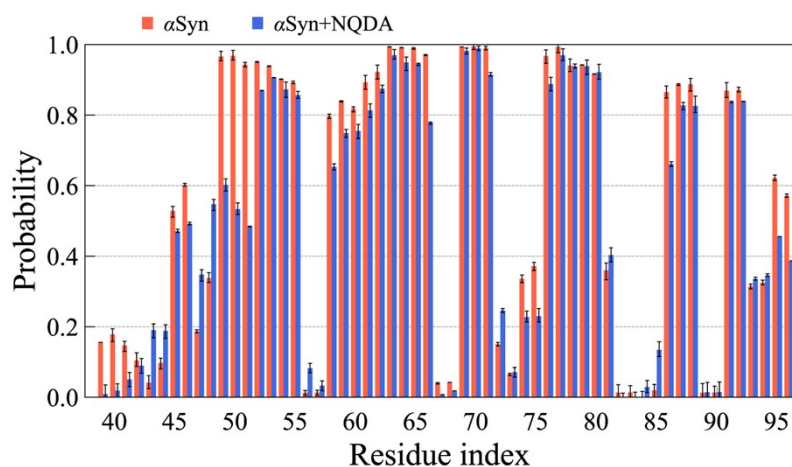

**Fig. S2** The  $\beta$ -sheet probabilities of each amino acid residue of  $\alpha$ Syn in the absence and presence of NQDA. The error bars are calculated using the bootstrap method.

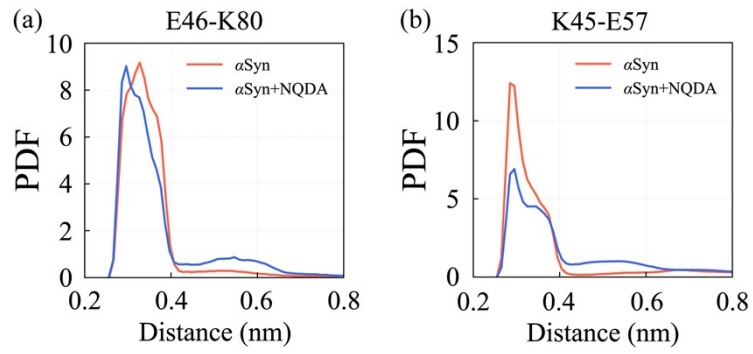

**Fig. S3** The probability density function (PDF) of E46-K80 salt-bridge distance (a) and K45-E57 salt-bridge distance (b).

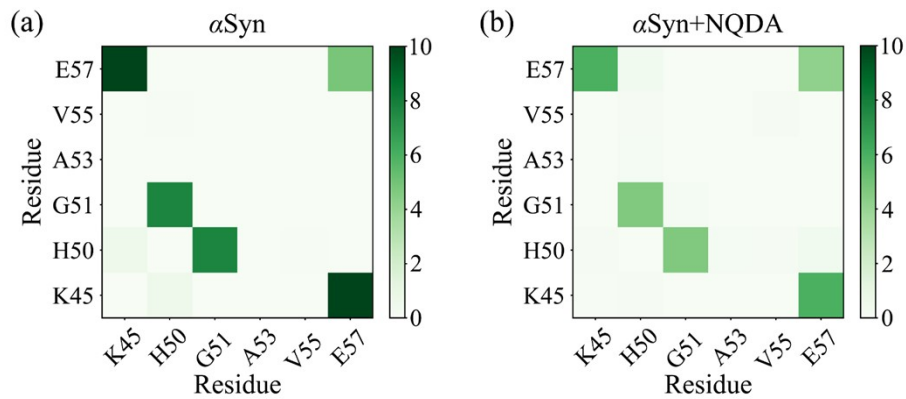

**Fig. S4** The H-bond number map among the residues at protofibril interface. (a) H-bond number map of  $\alpha$ Syn system. (b) H-bond number map of  $\alpha$ Syn+NQDA system.

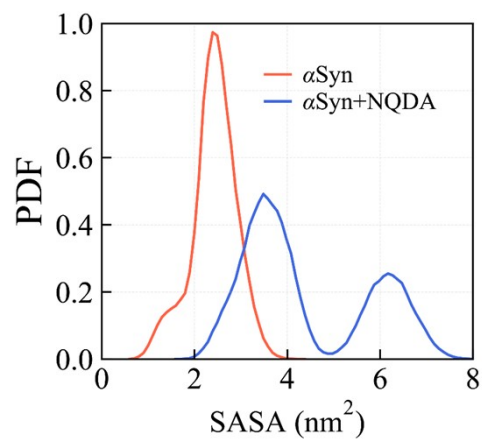

**Fig. S5** The probability density function (PDF) of solvent accessible surface area (SASA) of H50 in the absence and presence of NQDA.

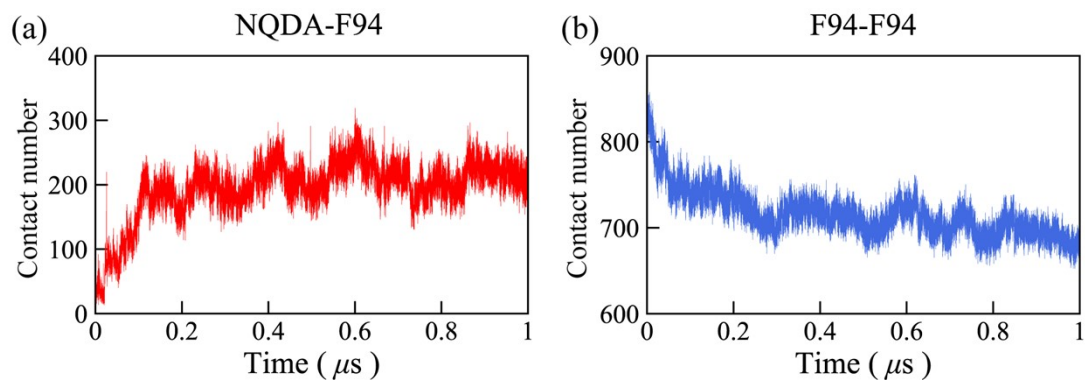

**Fig. S6** The contact numbers of (a) NQDA-F94 and (b) F94-F94 as a function of simulation time.

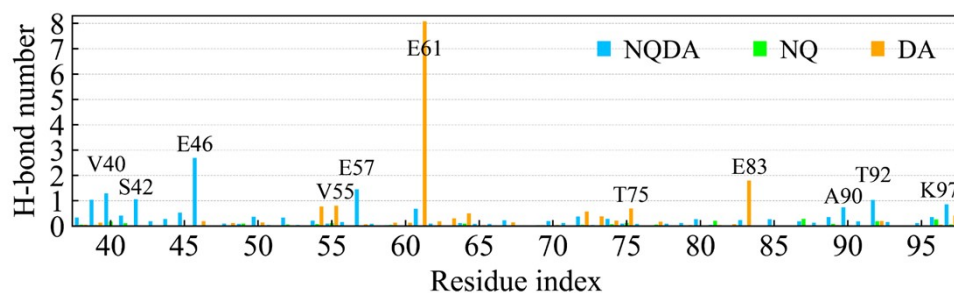

**Fig. S7** The H-bond number formed between each residue and NQDA, NQ, or DA molecules.

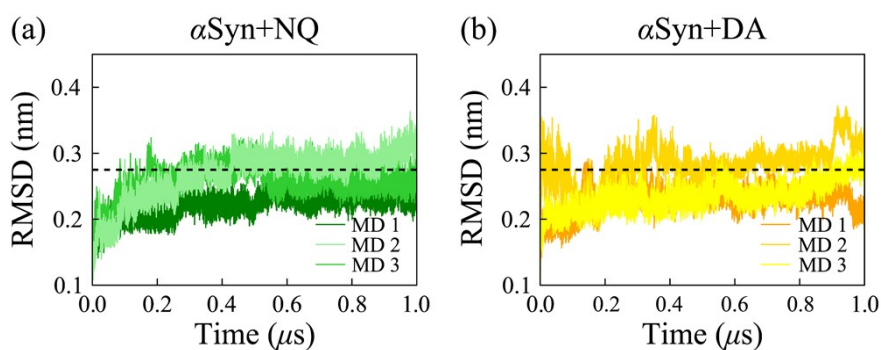

**Fig. S8** The backbone root mean square deviation (RMSD) of  $\alpha\text{Syn}$  fibril in (a)  $\alpha\text{Syn+NQ}$ , (b)  $\alpha\text{Syn+DA}$  systems. The dashed line in (a-b) is the average RMSD of  $\alpha\text{Syn}$  fibril in  $\alpha\text{Syn}$  system over three MD simulations between 0.6  $\mu\text{s}$  to 1.0  $\mu\text{s}$ .

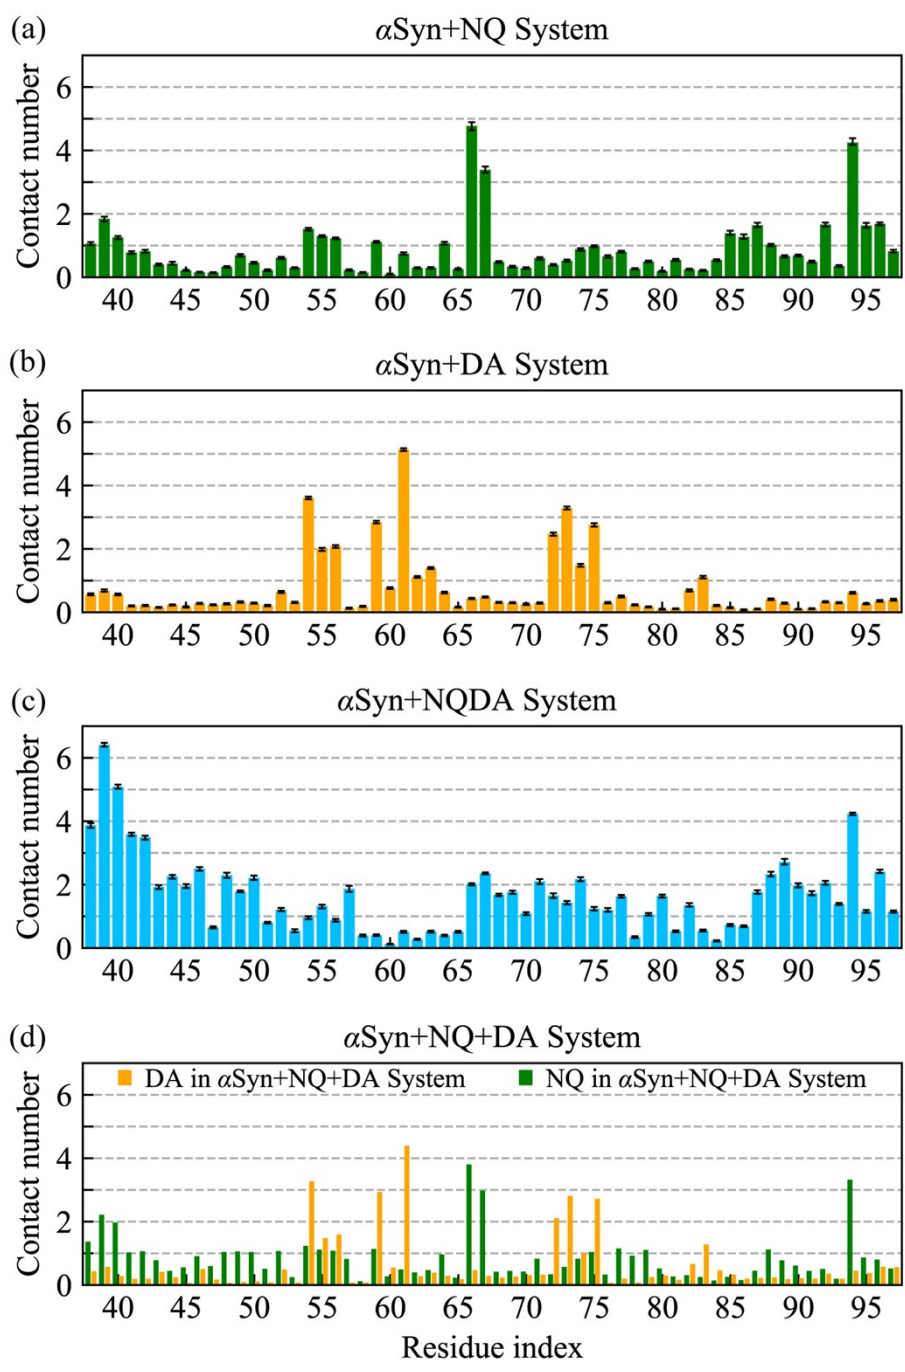

**Fig. S9** Contact number between NQDA, NQ, DA or NQ+DA molecules and each residue of  $\alpha$ Syn fibril in (a)  $\alpha$ Syn+NQ, (b)  $\alpha$ Syn+DA, (c)  $\alpha$ Syn+NQDA, and (d)  $\alpha$ Syn+NQ+DA systems.

**Table S1** The binding free energy (predicted by MM-PBSA calculations and the solute dielectric constant  $\epsilon=9$ ) between  $\alpha$ Syn fibril and DA, NQ, or NQDA molecules (kcal/mol)

| System            | $\Delta E_{vdW}$   | $\Delta E_{elec}$ | $\Delta G_{polar}$ | $\Delta G_{nonpolar}$ | $\Delta G_{binding}$   |
|-------------------|--------------------|-------------------|--------------------|-----------------------|------------------------|
| $\alpha$ Syn+DA   | -                  | 393.82 $\pm$ 21.  | 285.12 $\pm$ 53.   | -                     | 561.24 $\pm$ 4         |
|                   | 100.31 $\pm$ 17.62 | 35                | 93                 | 17.40 $\pm$ 2.<br>60  | 5.60                   |
| $\alpha$ Syn+NQ   | -                  | -4.68 $\pm$ 14.84 | 72.83 $\pm$ 27.2   | -                     | -                      |
|                   | 153.25 $\pm$ 23.02 |                   | 5                  | 17.32 $\pm$ 2.<br>68  | 102.65 $\pm$ 3<br>0.50 |
| $\alpha$ Syn+NQDA | -                  | -28.63 $\pm$ 4.95 | 162.19 $\pm$ 26.   | -                     | -                      |
|                   | 277.69 $\pm$ 18.51 |                   | 36                 | 30.57 $\pm$ 1.<br>98  | 174.71 $\pm$ 2<br>7.05 |

**Table S2** The binding free energy (predicted by MM-PBSA calculations and the solute dielectric constant  $\epsilon=4$ ) between  $\alpha$ Syn fibril and DA, NQ, or NQDA molecules (kcal/mol)

| System            | $\Delta E_{vdW}$   | $\Delta E_{elec}$ | $\Delta G_{polar}$ | $\Delta G_{nonpolar}$ | $\Delta G_{binding}$  |
|-------------------|--------------------|-------------------|--------------------|-----------------------|-----------------------|
| $\alpha$ Syn+DA   | -                  | 886.11 $\pm$ 48.  | 389.16 $\pm$ 66.   | -                     | 1157.56 $\pm$ 6       |
|                   | 100.31 $\pm$ 17.62 | 04                | 58                 | 17.40 $\pm$ 2.6<br>0  | 1.27                  |
| $\alpha$ Syn+NQ   | -                  | -10.53 $\pm$ 4.48 | 96.91 $\pm$ 30.1   | -                     | -                     |
|                   | 153.50 $\pm$ 23.03 |                   | 0                  | 17.31 $\pm$ 2.6<br>9  | 84.43 $\pm$ 30.<br>71 |
| $\alpha$ Syn+NQDA | -                  | -                 | 232.16 $\pm$ 32.   | -                     | -                     |
|                   | 277.70 $\pm$ 18.51 | 64.42 $\pm$ 11.1  | 74                 | 30.57 $\pm$ 1.9       | 140.52 $\pm$ 27       |

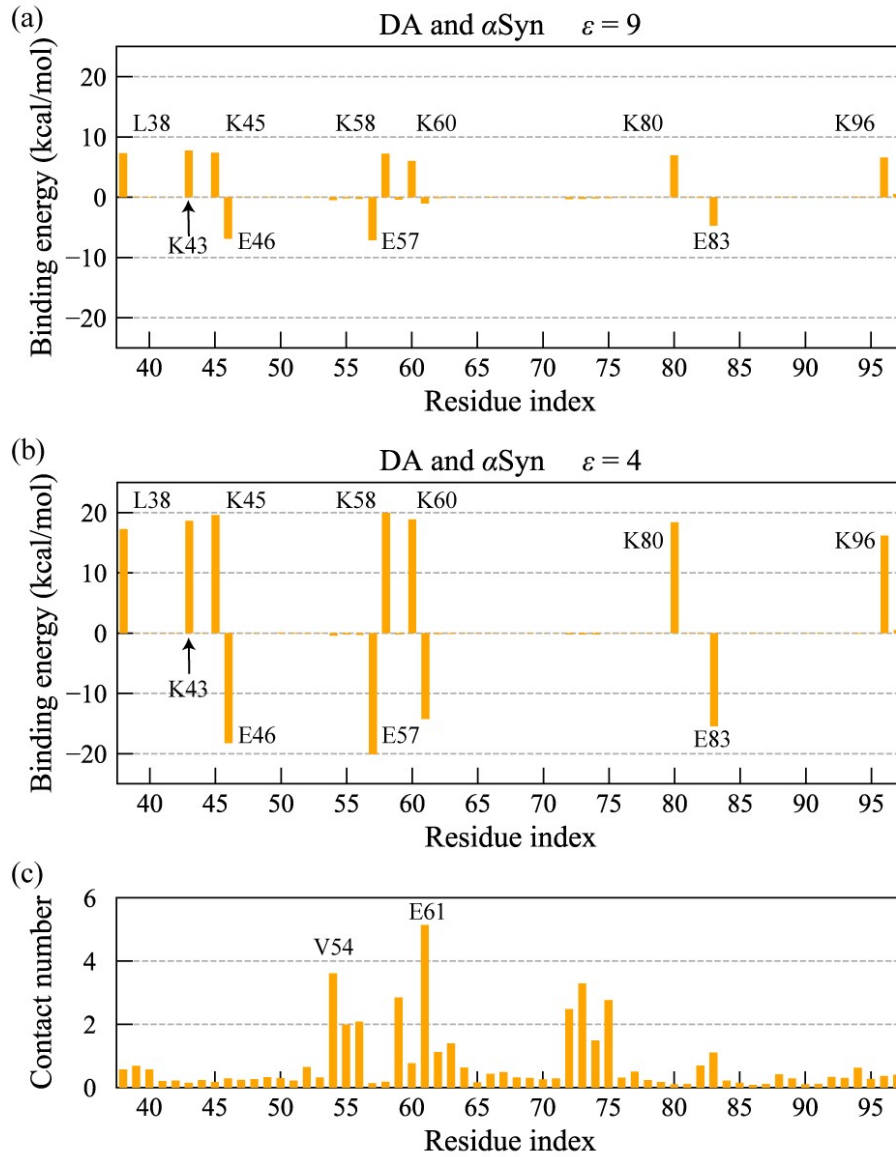

**Fig. S10** Comparison of binding free energy using a solute dielectric constant  $\epsilon=9$  (a) or (b)  $\epsilon=4$  (predicted by MM-PBSA calculations) with (c) contact number between DA molecules and each residue of  $\alpha$ Syn fibril.

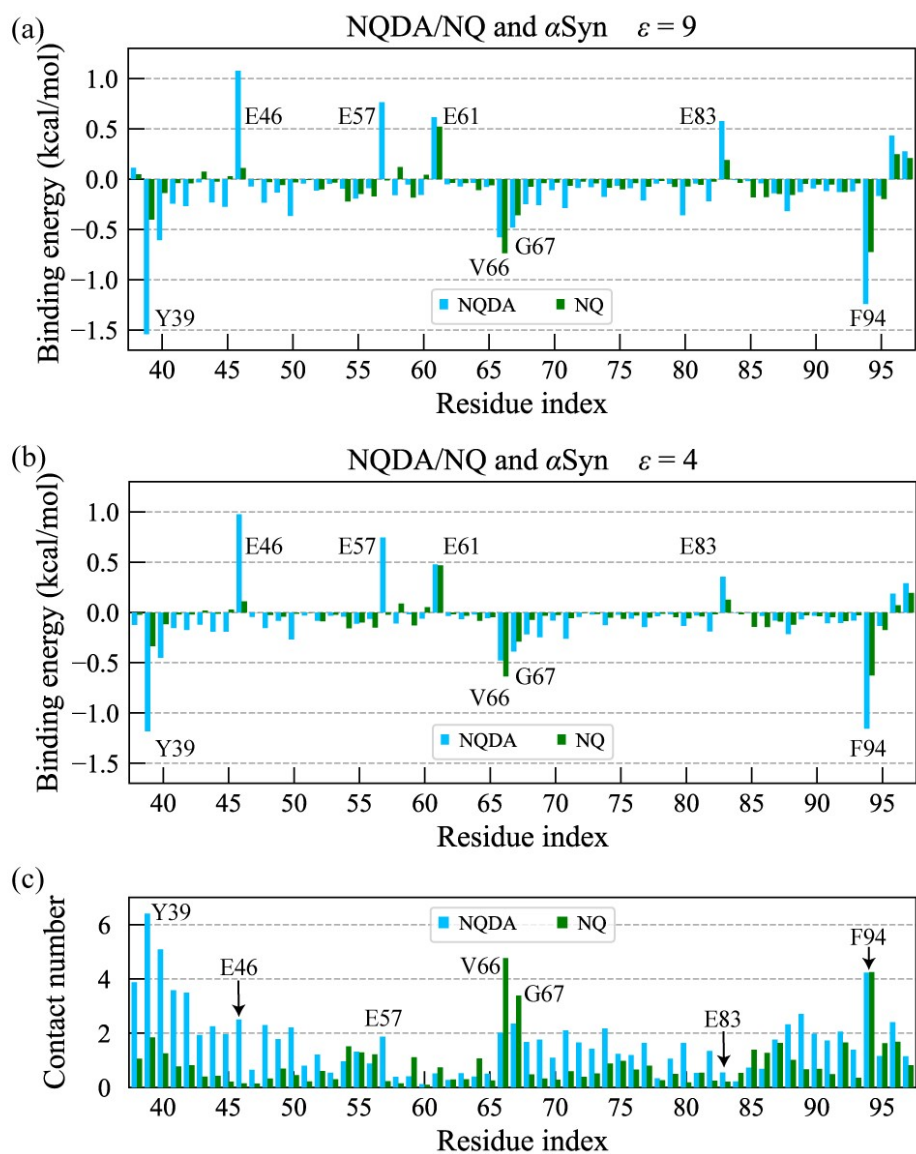

**Fig. S11** Comparison of binding free energy using a solute dielectric constant (a)  $\epsilon=9$  or (b)  $\epsilon=4$  (predicted by MM-PBSA calculations) with (c) contact number between NQDA/NQ molecules and each residue of  $\alpha$ Syn fibril.



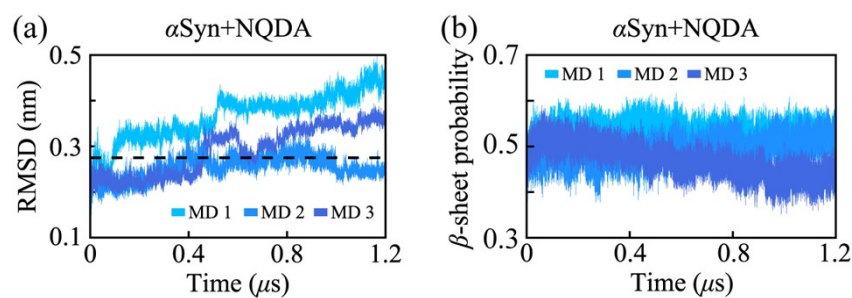

**Fig. S12** The time evolution of (a) backbone RMSD values and (b)  $\beta$ -sheets probability of  $\alpha$ Syn fibril in  $\alpha$ Syn+NQDA system. The dashed line denotes the average RMSD of  $\alpha$ Syn fibril over the last 0.4  $\mu$ s of three MD runs.

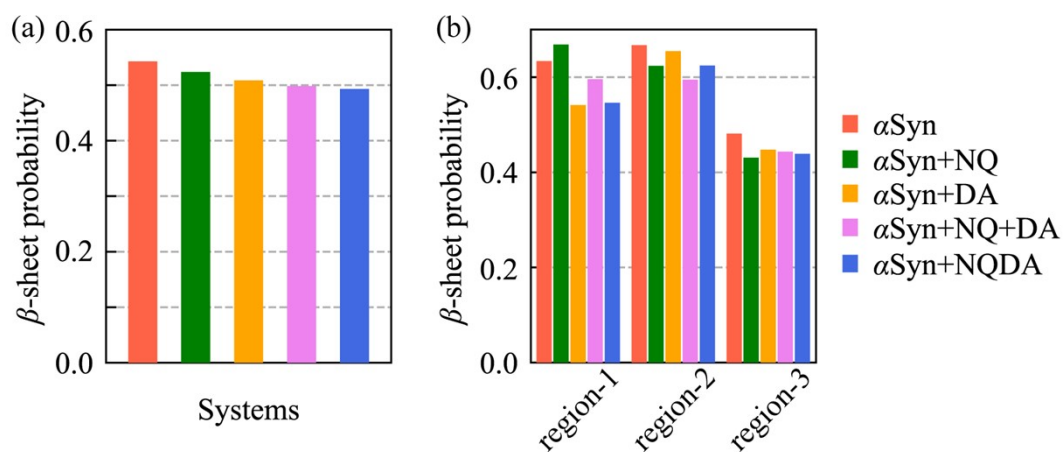

**Fig. S13** The  $\beta$ -sheet probability of (a) fibril and (b) each of the three regions (region-1 (residues 45-57), region-2 (residues 58-83), region-3 (residues 84-96)) in  $\alpha$ Syn,  $\alpha$ Syn+NQ,  $\alpha$ Syn+DA,  $\alpha$ Syn+NQ+DA, and  $\alpha$ Syn+NQDA systems.

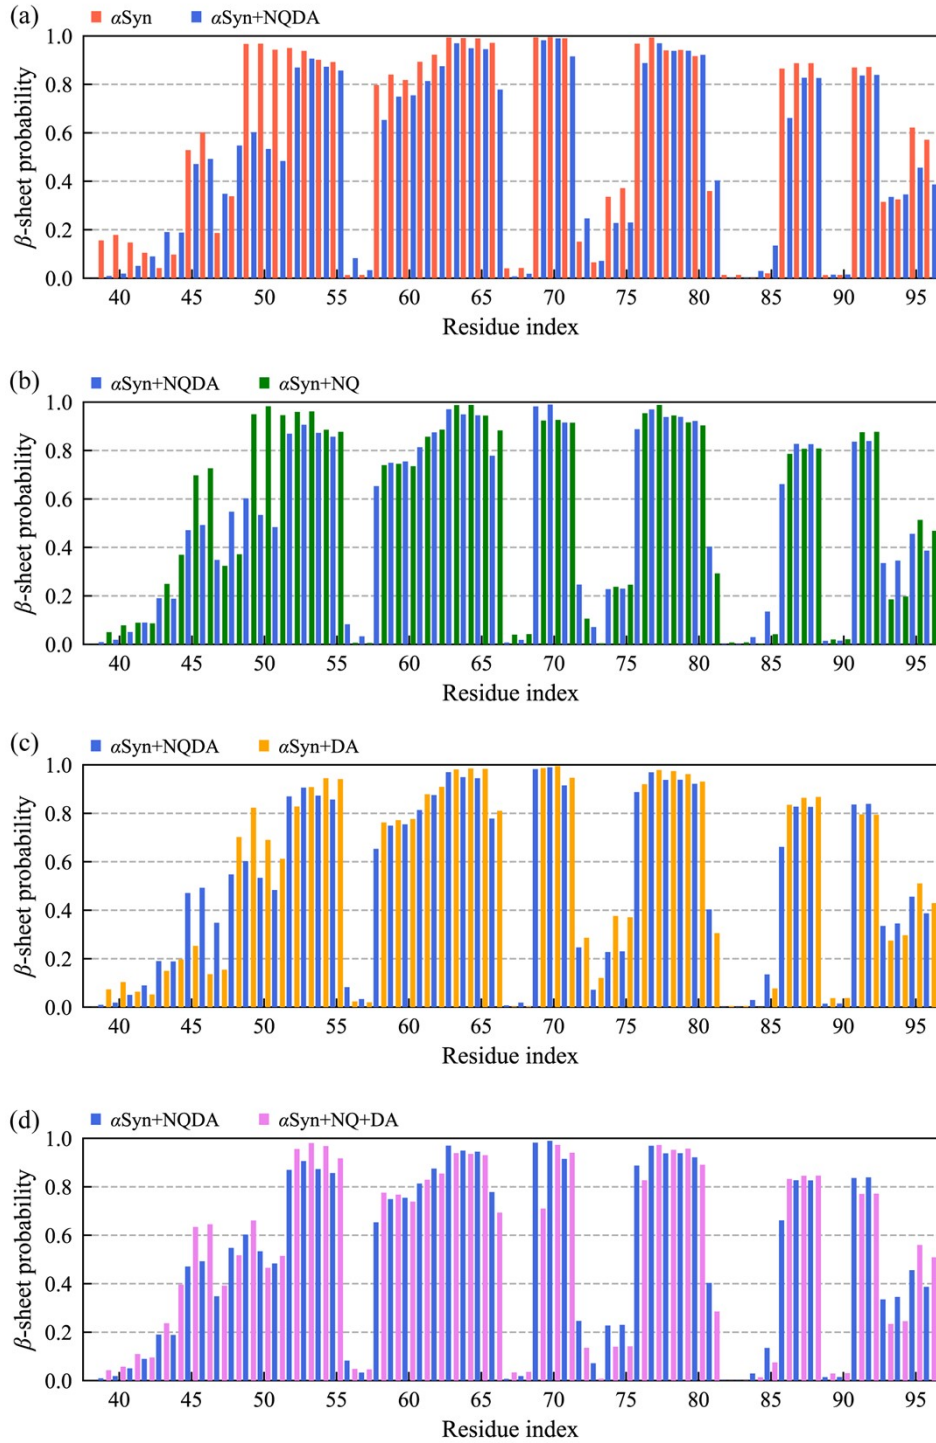

**Fig. S14** Comparisons of  $\beta$ -sheet probability of each residue in  $\alpha$ Syn+NQDA system with that in the other four systems: (a)  $\alpha$ Syn with  $\alpha$ Syn+NQDA system, (b)  $\alpha$ Syn+NQ with  $\alpha$ Syn+NQDA system, (c)  $\alpha$ Syn+NQ with  $\alpha$ Syn+NQDA system, and (d)  $\alpha$ Syn+NQ+DA with  $\alpha$ Syn+NQDA system.

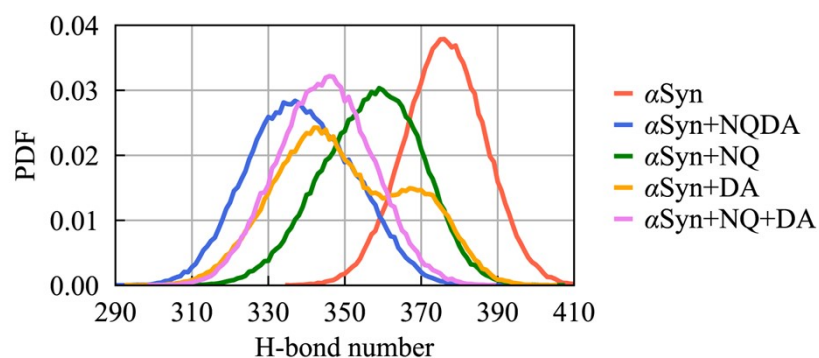

**Fig. S15** The PDF of total H-bond number in  $\alpha$ Syn,  $\alpha$ Syn+NQDA,  $\alpha$ Syn+NQ,  $\alpha$ Syn+DA, and  $\alpha$ Syn+NQ+DA systems.

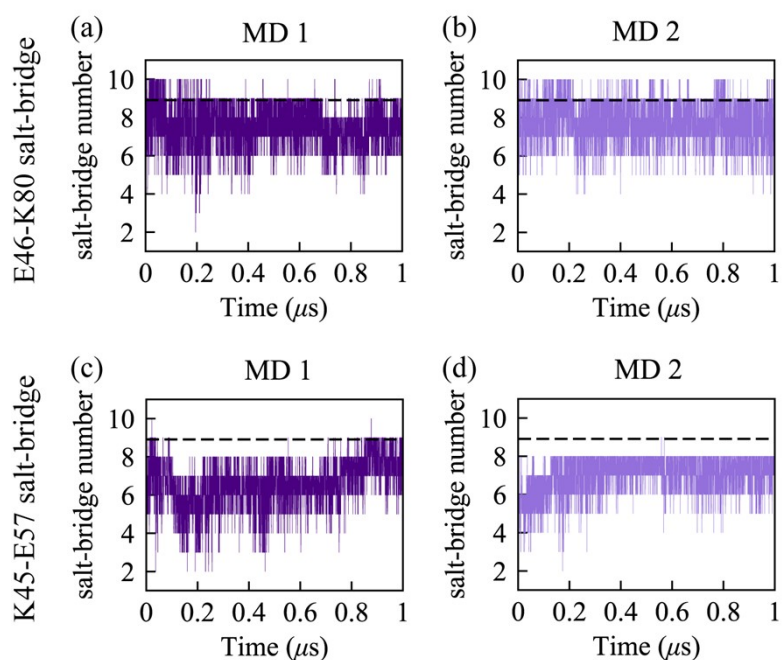

**Fig. S16** The time evolution of E46-K80 (a-b) and K45-E57 (c-d) salt-bridge number in two MD simulations of  $\alpha$ Syn+NQ+DA systems. The dashed line denotes the average salt-bridge number of  $\alpha$ Syn fibril without small molecules over the last 0.4  $\mu$ s of all MD runs.

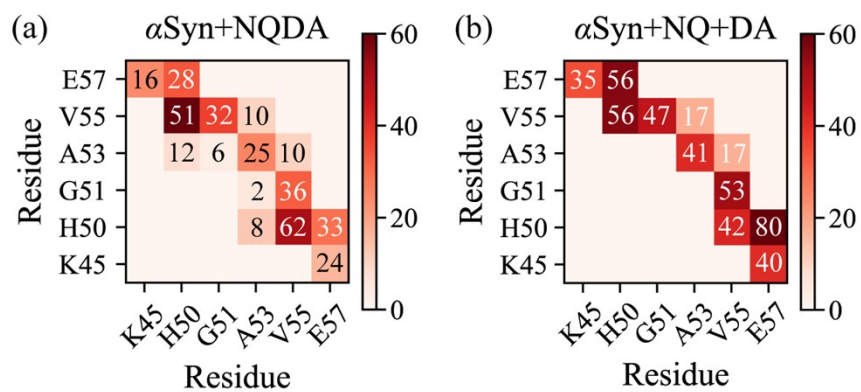

**Fig. S17** The Contact number of the protofibril interface residues in (a)  $\alpha$ Syn+NQDA and (b)  $\alpha$ Syn+NQ+DA systems.
